# Supplementary material for: PARP inhibitor and PRMT5 inhibitor synergy is independent of BRCA1/2 and MTAP status in breast cancer cells
Source: Research Square preprint supplement (doi:10.21203/rs.3.rs-6959243/v1), 2025-07-15
Supplement: Supplementary file 1 [file 819474f270c437767fcd20ca.pdf]

## Supplementary Material for

### PARP inhibitor and PRMT5 inhibitor synergy is independent of *BRCA1/2* and *MTAP* status in breast cancer cells

Samyuktha Suresh<sup>1</sup>, Lisa McPherson<sup>1</sup>, James M Ford<sup>1</sup>

<sup>1</sup>Department of Medicine, Division of Oncology, Stanford University, Stanford, CA 94305

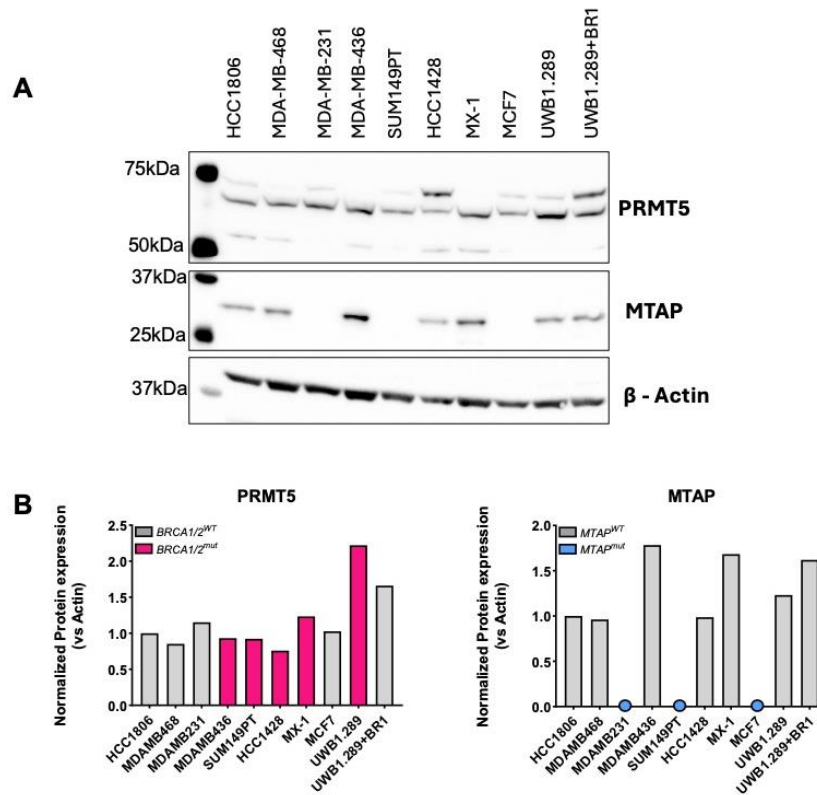

**Supplemental Figure 1: PRMT5 and MTAP protein expression in a panel of breast and ovarian cancer cell lines. (A)** Proteins were harvested using RIPA lysis buffer from each cell line. Anti-PRMT5 and anti-MTAP antibodies were used to detect the expression of PRMT5 and MTAP, and anti- $\beta$ -actin was used as a loading control. Presented western blot is representative of three independent biological replicates. Uncropped blot can be found in Supplemental Figure 9. **(B)** Relative quantitation of PRMT5 (left) and MTAP (right) protein bands normalized to loading control ( $\beta$ -actin).

**A**

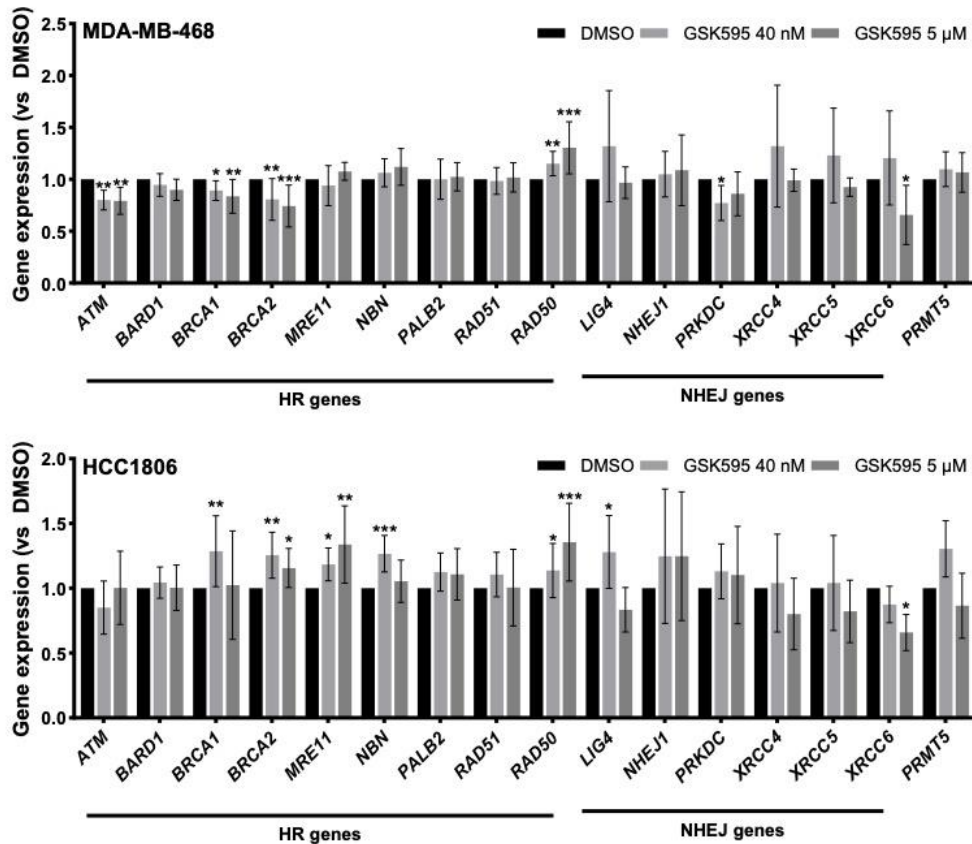

**B**

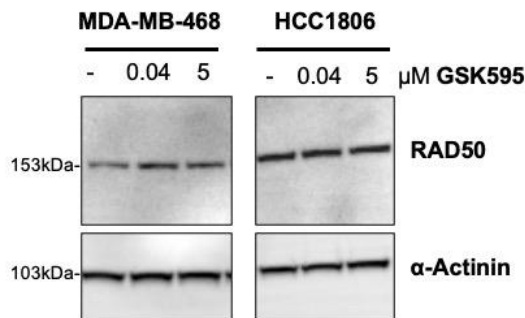

**C**

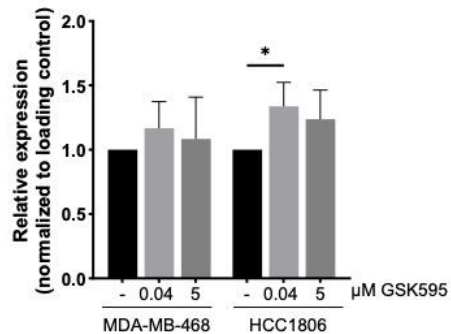

**Supplemental Figure 2: Relative mRNA expression of homologous recombination and non-homologous end-joining pathway genes with or without GSK595 treatment.** MDA-MB-468 and HCC1806 cells were treated with two doses of GSK595 or equivalent amounts of DMSO for 24h. (A) RT-qPCR was performed to determine the mRNA expression of different genes relative to GAPDH. Bars represent mean  $\pm$  SD from three independent experiments done in technical triplicates. Students T test was used to determine statistical significance with \*  $p < 0.05$ , \*\*  $p < 0.01$ , \*\*\*  $p < 0.001$ . (B) Proteins were harvested using RIPA lysis buffer from each cell line. Anti-RAD50 antibody was used to detect the expression of RAD50, and anti- $\alpha$ -actinin was used as a

loading control. Presented western blot is representative of three independent biological replicates. Uncropped blot can be found in Supplemental Figure 10. (C) Relative quantitation of RAD50 protein bands normalized to loading control ( $\alpha$ -actinin). Bars represent mean  $\pm$  SD from three independent experiments. Students T test was used to determine statistical significance with \*  $p < 0.05$ .

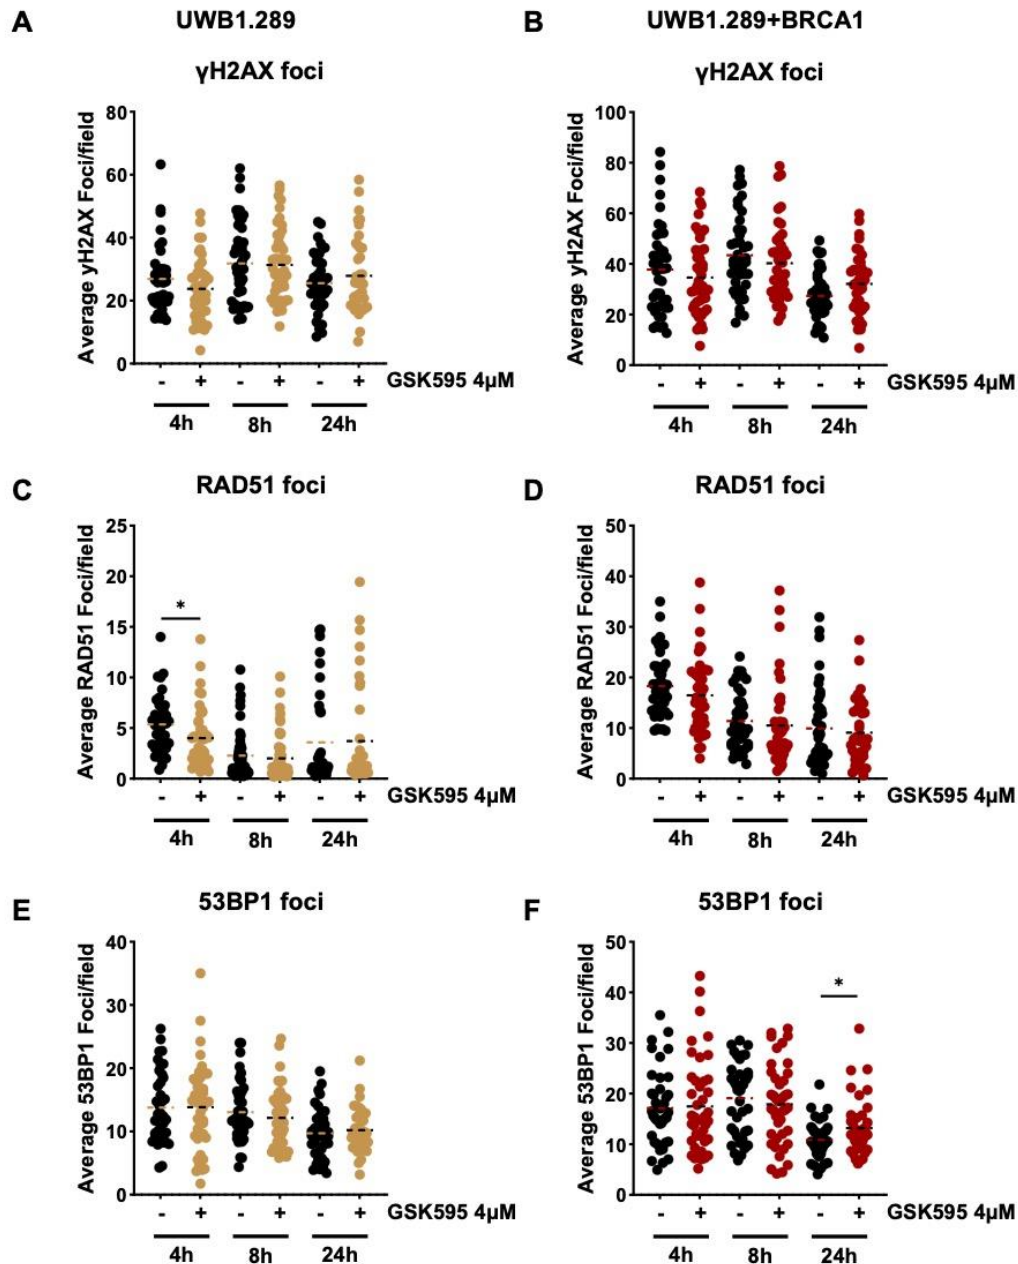

**Supplemental Figure 3: RAD51, 53BP1 and  $\gamma$ H2AX foci count in UWB1.289 and UWB1.289+BRCA1 cells after 4h, 8h, or 24h of GSK595 or DMSO treatment.** Average number of foci per field of imaging were counted for each of RAD51, 53BP1, and  $\gamma$ H2AX markers in both UWB1.289 and UWB1.289+BRCA1 cells after 4h, 8h, or 24h of GSK595 4 $\mu$ M or DMSO treatments. Statistical significance was determined using a Student's T Test and \* represents  $p < 0.05$ .

**UWB1.289**

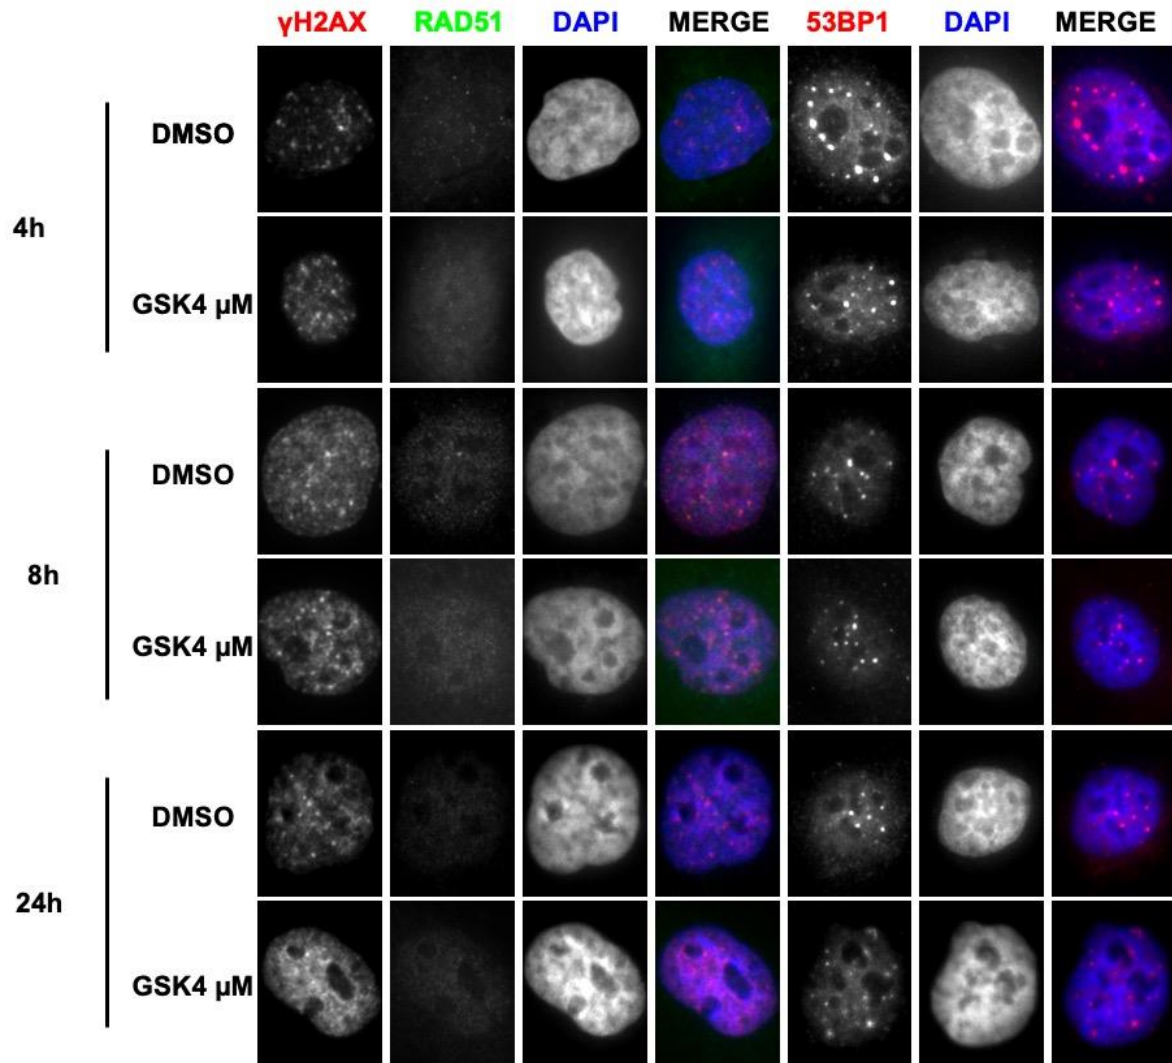

**Supplemental Figure 4: Representative images of RAD51, 53BP1 and  $\gamma$ H2AX foci in UWB1.289 cells after 4h, 8h, or 24h of GSK595 or DMSO treatment.**

UWB1.289+BRCA1

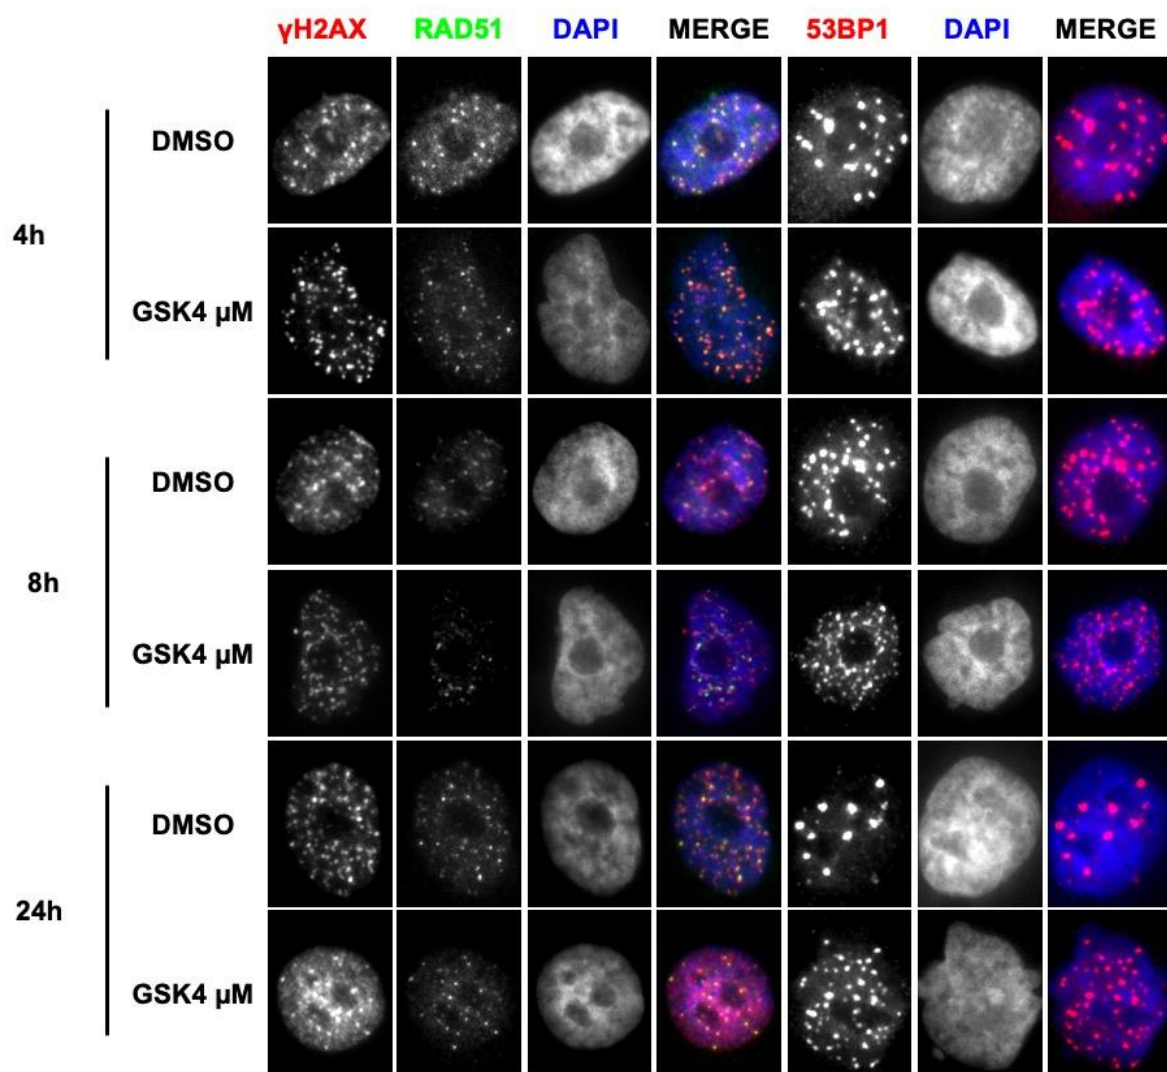

Supplemental Figure 5: Representative images of RAD51, 53BP1 and  $\gamma$ H2AX foci in UWB1.289+BRCA1 cells after 4h, 8h, or 24h of GSK595 or DMSO treatment.



Uncropped blots for Figure 1b, for HCC1806, MDAMB468, SUM149, and MDAMB436 cell lines

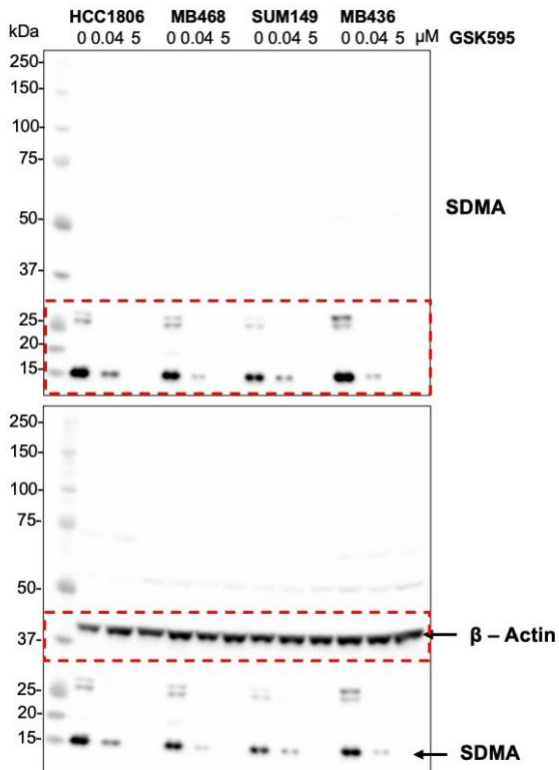

SDMA blot was re-probed with  $\beta$  - Actin antibody

Uncropped blots for Figure 1b - MX1 and HCC1428 cell lines

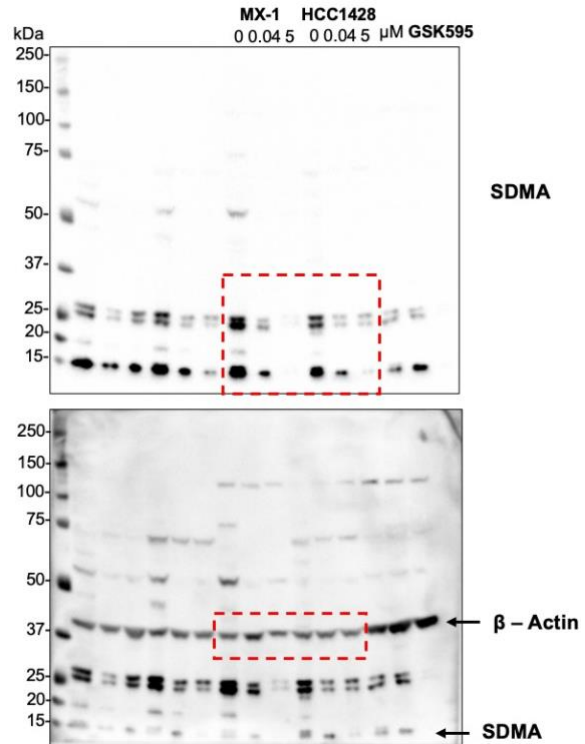

SDMA blot was re-probed with  $\beta$  - Actin antibody

**Supplemental Figure 6:** Uncropped blots of the western blots shown in Figure 1B for HCC1806, MDAMB468, SUM149PT, MDAMB436, MX1, and HCC1428 cell lines. The red dashed box marks the part of the blot shown in the main figure.

**Uncropped blots for Figure 1b (MDAMB231 cell line) and Figure 3b (UWB1.289 and UWB1.289+BRCA1 cell lines)**

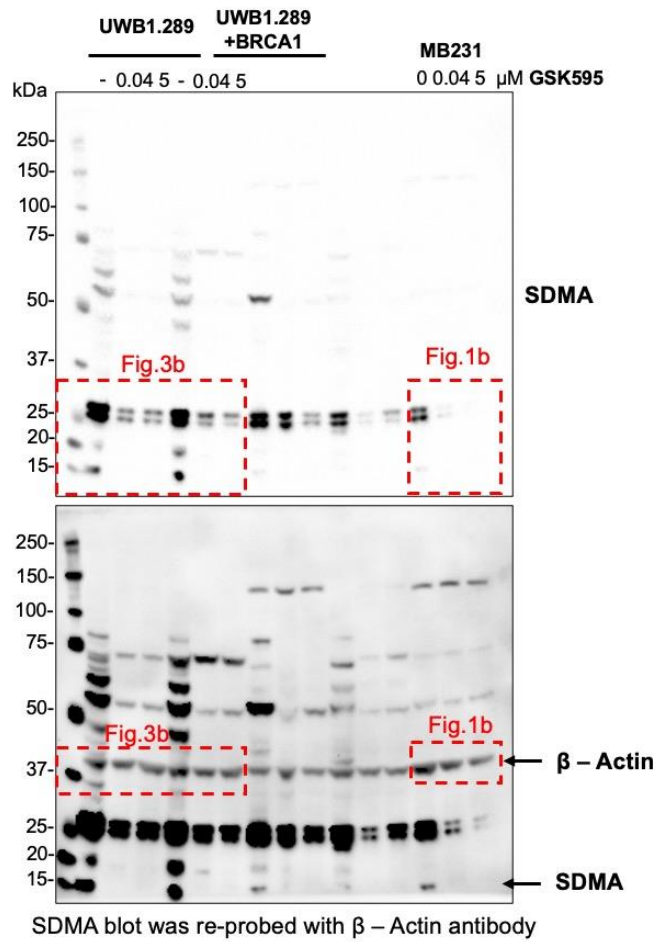

**Supplemental Figure 7:** Uncropped blots of the western blots shown in Figure 1B for the MDAMB231 cell line and for the UWB1.289 and UWB1.289+BRCA1 cell lines shown in Figure 3B. The red dashed boxes mark the parts of the blots shown in the main figures.

Uncropped blots for Figure 4b - MDAMB468, HCC1806, MDAMB436, and SUM149 cell lines

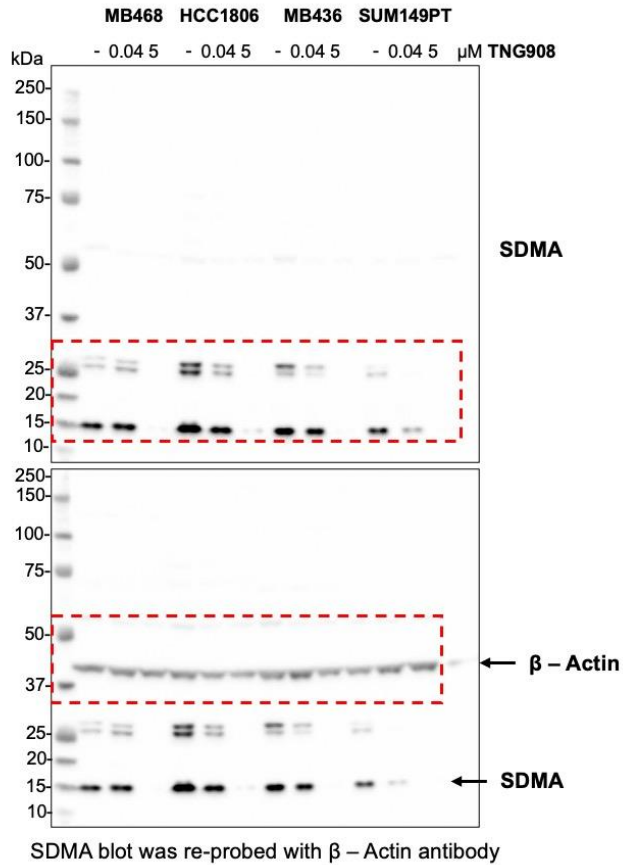

Uncropped blots for Figure 4b - MDAMB231 cell line

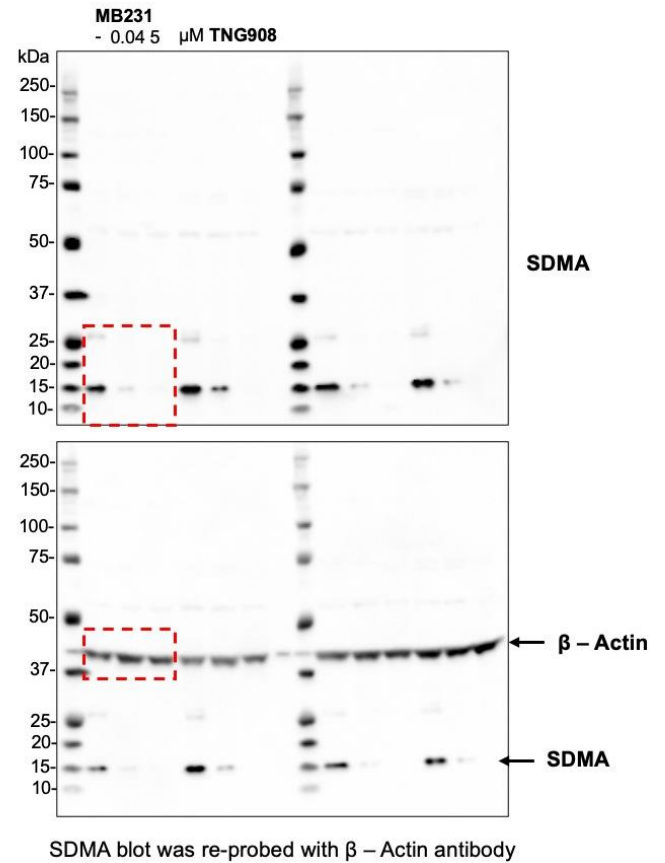

**Supplemental Figure 8:** Uncropped blots of the western blots shown in Figure 4B for MDAMB468, HCC1806, SUM149PT, MDAMB436, and MDAMB231 cell lines. Red dashed boxes mark the parts of the blots shown in the main figure.



# Uncropped blots for Supplemental Figure 1a

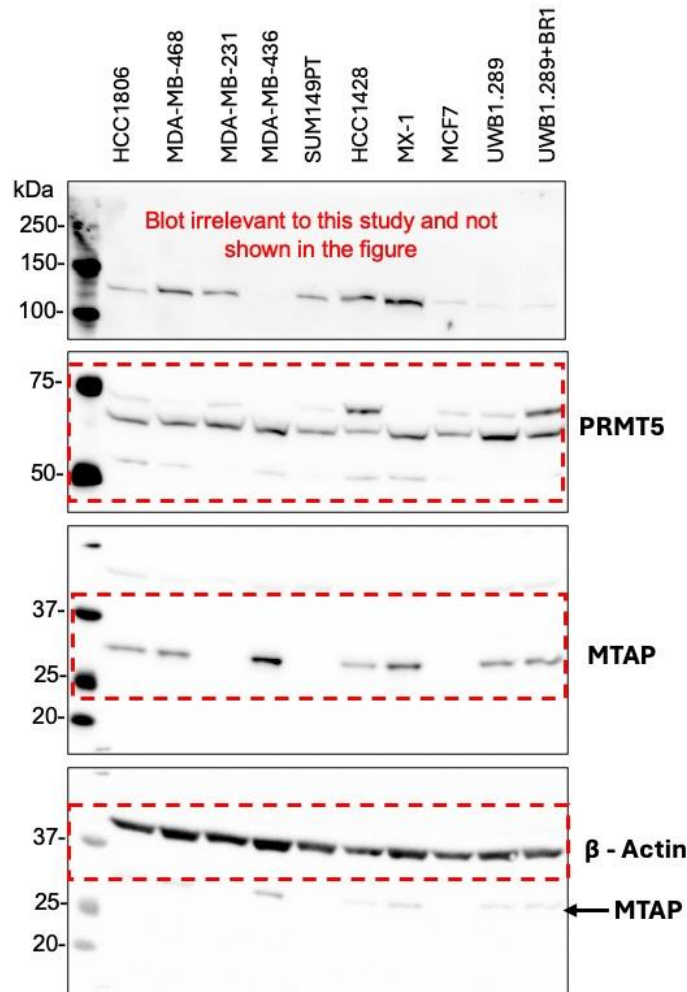

MTAP blot was re-probed with  $\beta$ -Actin antibody.

**Supplemental Figure 9:** Uncropped blots of the western blots shown in Supplemental Figure 1A. The red dashed boxes mark the parts of the blots shown in the main figure. As shown, the membrane was cut after 100kDa and 50kDa after protein transfer to hybridize with different antibodies. The upper blot (250-100kDa) is irrelevant to this study and not shown in the main figure.

# Uncropped blots for Supplemental Figure 2B

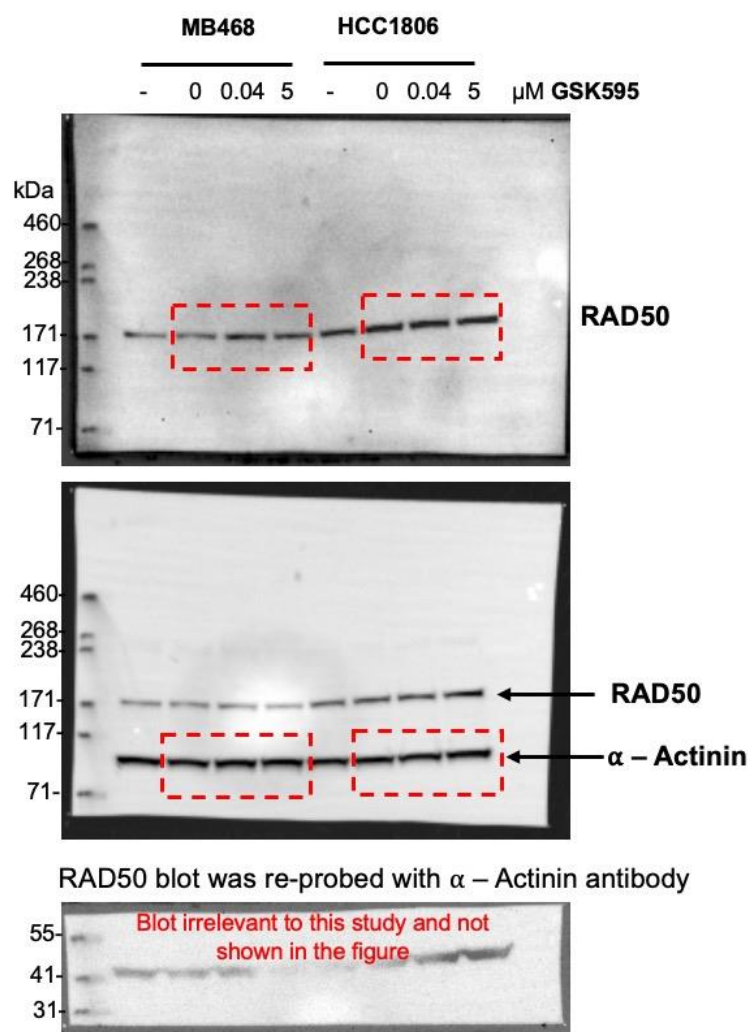

**Supplemental Figure 10:** Uncropped blots of the western blots shown in Supplemental Figure 2B. The red dashed boxes mark the parts of the blots shown in the main figure. After protein transfer, the membrane was cut below 71kDa and hybridized with RAD50 antibody. The lower part of the membrane (55-31kDa) is irrelevant to this study and not shown in the main figure.

**Supplementary Table 1:** List of Primers used for qPCR in this study.

| Target       | Forward Primer         | Reverse Primer         |
|--------------|------------------------|------------------------|
| <b>ATM</b>   | GAGAGGAGACAGCTTGTTAAGG | CCTCTTCCTAGTTTCCGTGTTT |
| <b>BARD1</b> | GATGTCTAGTCCCTCAGCAATG | CAGAAGGTATGTCGCCCTTAAT |
| <b>BRCA1</b> | CAGTCGGGAAACAAGCATAGA  | GCACATTCTCTTCTGCATTTC  |
| <b>BRCA2</b> | GAAGCCCTTTGAGAGTGGAA   | CTCCATCTGGGCTCCATTAG   |

|                        |                        |                           |
|------------------------|------------------------|---------------------------|
| <b>GAPDH</b>           | AGCCACATCGCTCAGACAC    | GCCCAATACGACCAAATCC       |
| <b>MRE11</b>           | GATGAAGTCCGTGAGGCTATG  | AGCCATCTGTTCTGCTAAATCT    |
| <b>NBN</b>             | GCAAGGGAGTTAGGGAAATGA  | CTGGTCTCAATGCCTGTAGTAG    |
| <b>PALB2</b>           | CCGGTTGTAAAGAGCCATGTA  | CTGCGAAGTGCCAGGTATAA      |
| <b>PRMT5</b>           | GTTTCCCATCCTCTTCCCTATT | CCACTCATACCACACCTTCTT     |
| <b>RAD50</b>           | GCTTGGTCACTCCCTCTTATTT | GAGAGGCCAAGGAGTTGTATTAG   |
| <b>RAD51</b>           | GGCAGTGATGTCCTGGATAATG | CGGTGGCACTGTCTACAATAAG    |
| <b>XRCC6 (KU70)</b>    | CCAAGACCCGGACCTTTAATAC | AGTATAATCTGACGACTCCCATAGA |
| <b>XRCC5 (KU80)</b>    | CCATGAGCTTGGCAAAGAAAG  | GTGCAGCAGACACTGAAATAATC   |
| <b>PRKDC(DNA-PKcs)</b> | GAACATGGCAGGAGAGAATCA  | GAAGACACAGCAGATGACAGATA   |
| <b>LIG4</b>            | TTAAAGCAGCAGAGATCGTACC | GCCACTCCTTGTCTATCTCTTATC  |
| <b>XRCC4</b>           | GGAAGCTTTGGAGACTGATCTT | TCTCGTTCTTGAGCTGCATTTA    |
| <b>NHEJ1</b>           | GTCTCCATCTTTCCCTGATTCC | CAGGCTAGACTCTTTCCAGTTC    |

**Supplementary Table 2: List of Primary and Secondary Antibodies used in this study.**

| <b>Target</b>                                                       | <b>Application</b> | <b>Dilution</b> | <b>Supplier</b>             | <b>Catalog Number</b> | <b>RRID</b> |
|---------------------------------------------------------------------|--------------------|-----------------|-----------------------------|-----------------------|-------------|
| <b><math>\alpha</math>-Actinin</b>                                  | WB                 | 1:5000          | Proteintech                 | 11313-2-AP            | AB_2223815  |
| <b>SDMA</b>                                                         | WB                 | 1:1000          | Cell Signaling Technologies | 13222                 | AB_2714013  |
| <b><math>\beta</math>-Actin</b>                                     | WB                 | 1:5000          | Proteintech                 | 66009-1-Ig            | AB_2687938  |
| <b>MTAP</b>                                                         | WB                 | 1:1000          | Proteintech                 | 11475-1-AP            | AB_2147094  |
| <b>PRMT5</b>                                                        | WB                 | 1:1000          | SantaCruz Biotech           | sc-376937             | AB_2904201  |
| <b>RAD50</b>                                                        | WB                 | 1:1000          | Cell Signaling Technologies | 3427                  | AB_2176936  |
| <b><math>\gamma</math>-H2AX</b>                                     | IF                 | 1:1000          | Cell Signaling Technologies | 9718                  | AB_2118009  |
| <b>RAD51</b>                                                        | IF                 | 1:200           | Novus Biological            | NB100-148             | AB_10002131 |
| <b>53BP1</b>                                                        | IF                 | 1:200           | Novus Biological            | NB100-904SS           | AB_1290520  |
| <b>Goat anti-Rabbit IgG (H+L) HRP-conjugated Secondary Antibody</b> | WB                 | 1:10000         | Invitrogen                  | 31460                 | AB_228341   |
| <b>Goat anti-Mouse IgG (H+L) HRP-conjugated Secondary Antibody</b>  | WB                 | 1:10000         | Invitrogen                  | 31432                 | AB_228302   |

|                                                                      |    |               |            |        |            |
|----------------------------------------------------------------------|----|---------------|------------|--------|------------|
| <b>Goat anti-Rabbit IgG (H+L) Alexa Fluor 594 Secondary Antibody</b> | IF | 1:200 & 1:500 | Invitrogen | A11012 | AB_2534079 |
| <b>Goat anti-Mouse IgG (H+L) Alexa Fluor 488 Secondary Antibody</b>  | IF | 1:200 & 1:500 | Invitrogen | A11001 | AB_2534069 |

Abbreviations: WB: Western Blot, IF: Immunofluorescence.
